# Supplementary material
Source: bioRxiv or medRxiv preprint supplement (https://www.biorxiv.org/highwire/filestream/72126/field_highwire_adjunct_files/0/233114-1.pdf)
Supplement: Supplementary file [file 233114-1.pdf]

1 **SUPPLEMENTARY INFORMATION**

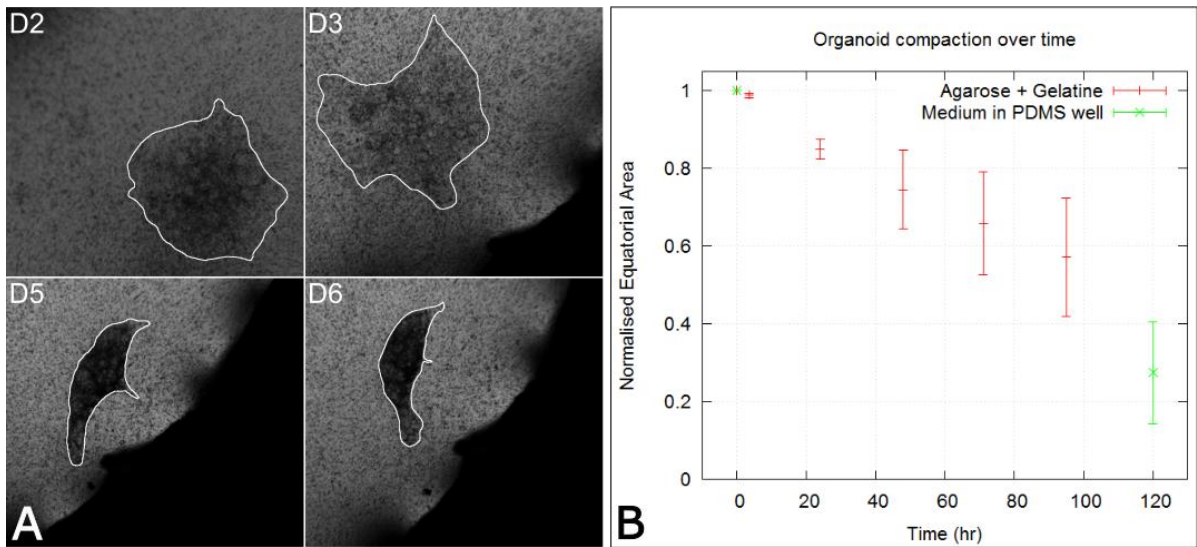

2  
3 **SI Figure 1:** A) Compaction and increasing optical density of a pellet cultured at air-liquid interface. The  
4 pellet was incubated on a micro-porous membrane and the label in the top left corner indicates the day of  
5 culture. At day two and three, the pellet has a comparatively large footprint (white outline) on the  
6 membrane whereas at day five, the cells have self assembled into a tissue with a much smaller footprint  
7 that appears much darker with some visible tubule-like structures. B) Organoid compaction over time  
8 measured as the equatorial area of organoids over five days. The agarose + gelatine refers to organoids  
9 that were embedded into this gel mixture 24 hours after re-aggregation. Error bars are the standard  
10 deviation of the normalised data.

11

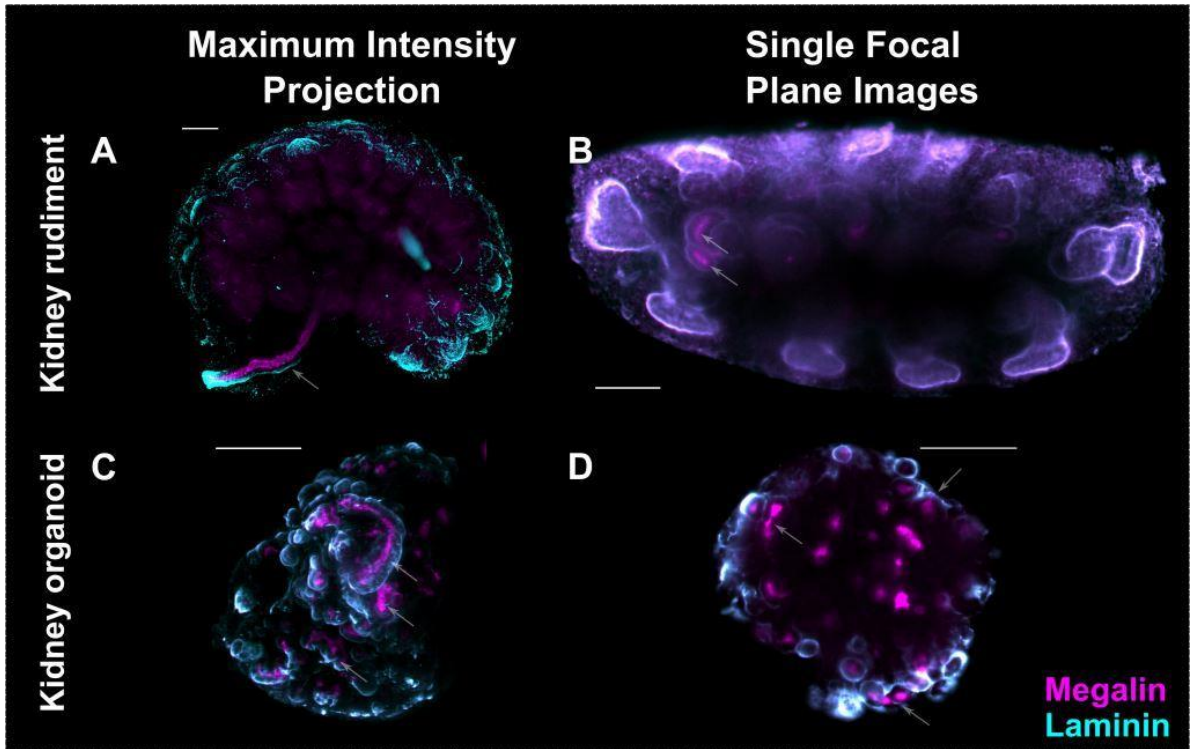

12

13 **SI Figure 2:** Immunostaining for tubular lumen with megalin and tubule and ureteric basement membranes with  
 14 laminin. (A) shows the maximum intensity projection and (B) a single focal plane of cleared whole mount fixed and  
 15 stained mouse embryonic E13.5 kidneys. There are few megalin<sup>+</sup> structures in the whole rudiments (arrows),  
 16 representative of the early developmental stage of the kidneys where only few tubules have developed. (B) shows  
 17 large laminin<sup>+</sup> structures which are megalin<sup>-</sup>, indicative of the ureteric bud. (C) shows the maximum intensity  
 18 projection and (D) a single focal plane of a cleared organoid that was fixed after six days of culture. There are many  
 19 megalin<sup>+</sup> structures, surrounded by laminin<sup>+</sup> membranes, indicative of nephric tubules (arrows). For both, kidney  
 20 rudiments and specifically organoids, the megalin penetration was superior to the laminin penetration and there  
 21 are megalin<sup>+</sup> structures that appear to be laminin<sup>-</sup>, which we consider untrue. Increasing the incubation times  
 22 resulted in increased unspecific staining but not in improved penetration depth. Had the laminin stain penetrated  
 23 deeper, we would have expected staining around those megalin<sup>+</sup> lumens as well. All samples were cleared. Scale  
 24 bars 100  $\mu$ m.

25

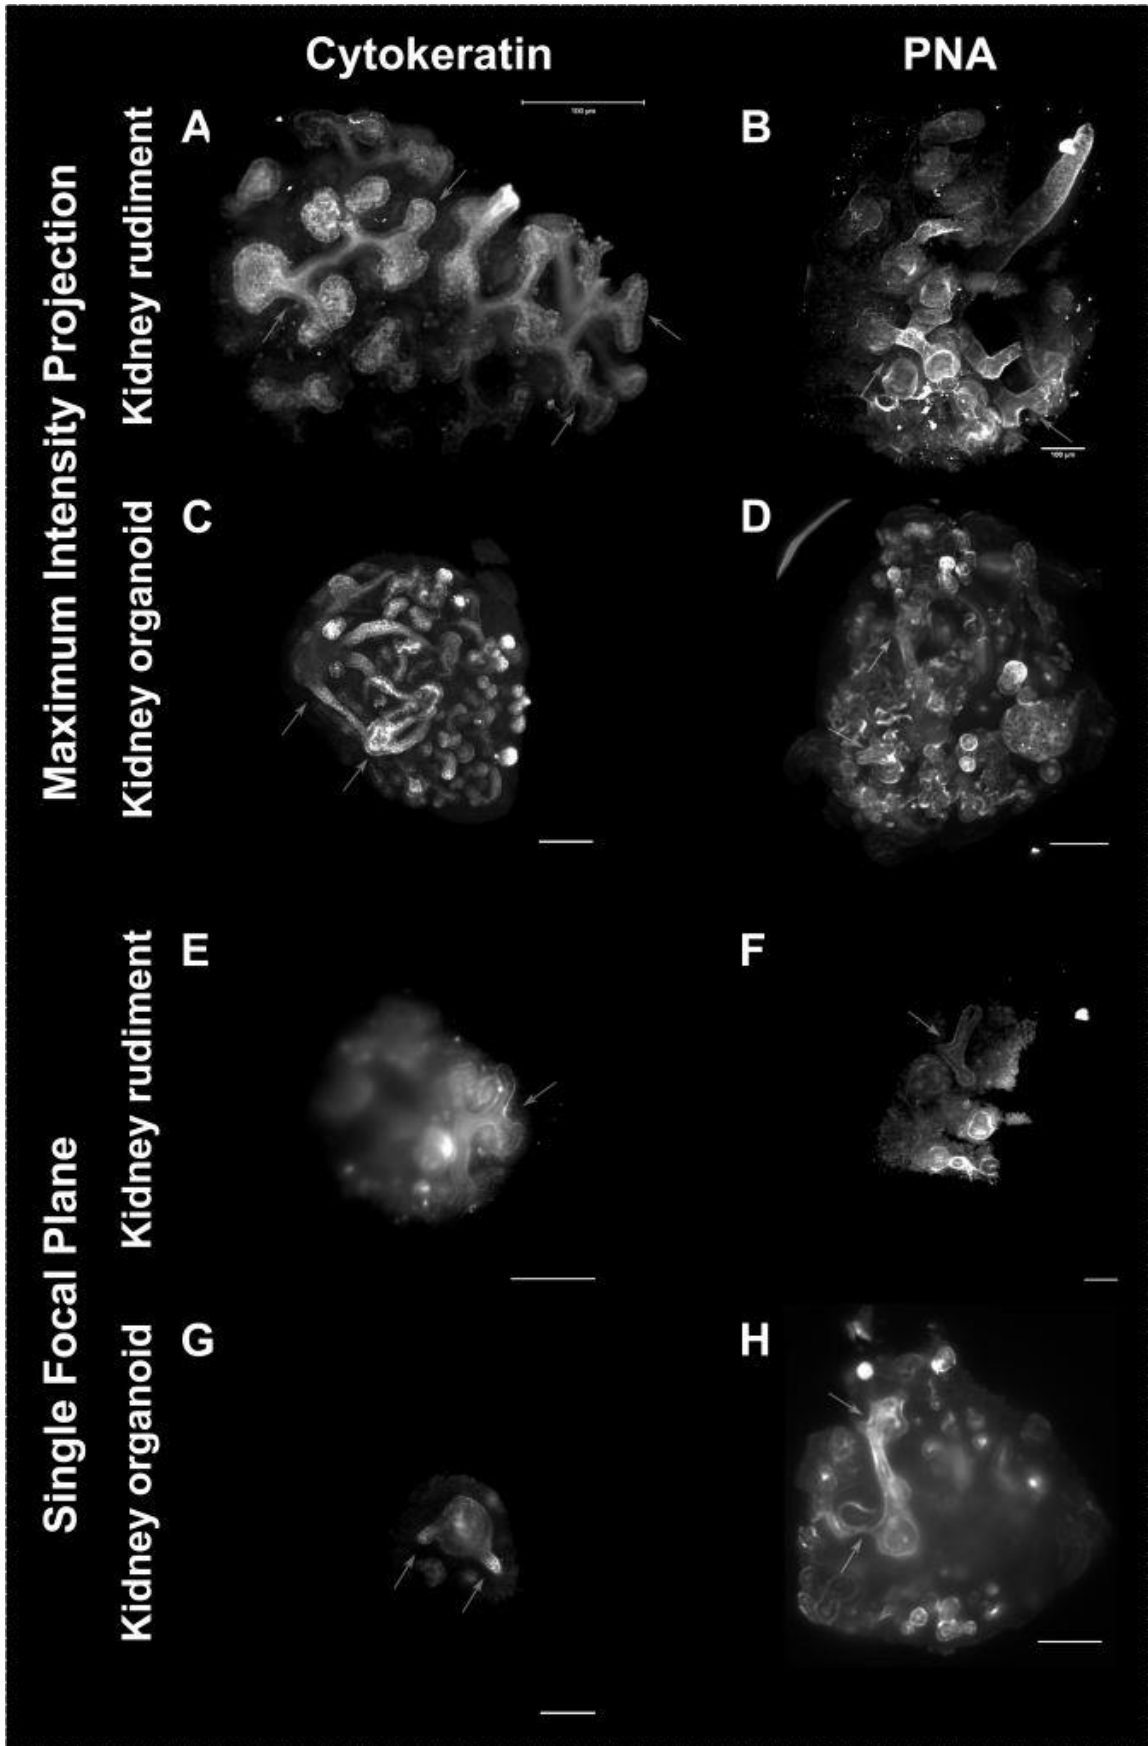

27 **SI Figure 3:** Immunostaining for the ureteric bud marker cytokeratin and basement membrane staining (PNA). A-  
28 D show maximum intensity projections and E-H show single focal plane images of whole mount fixed and stained  
29 mouse embryonic E13.5 kidney rudiments and organoids that were cultured for six days before fixing. Both, the  
30 cytokeratin and PNA staining reveal branched structures (arrows) in the intact rudiments and the spheroids. In the  
31 intact kidney rudiment in (A), the cytokeratin<sup>+</sup> cells are arranged in the typical tree shape of the ureteric bud, i.e. an  
32 intricate branch system connected to one base structure. The tree shape of another embryonic kidney is also  
33 highlighted by the basement membrane stain PNA in (B). In the spheroid in (C), the cytokeratin<sup>+</sup> cells are not  
34 organised in an interconnected structure. There are many independent cytokeratin<sup>+</sup> structures that have developed  
35 from different ureteric bud foci, causing a less organised ureteric tree structure, which is also reflected in the PNA  
36 staining, which simultaneously highlights developing nephrons. All samples but the spheroid shown in C/G were  
37 cleared. Scale bars 100  $\mu$ m.

38

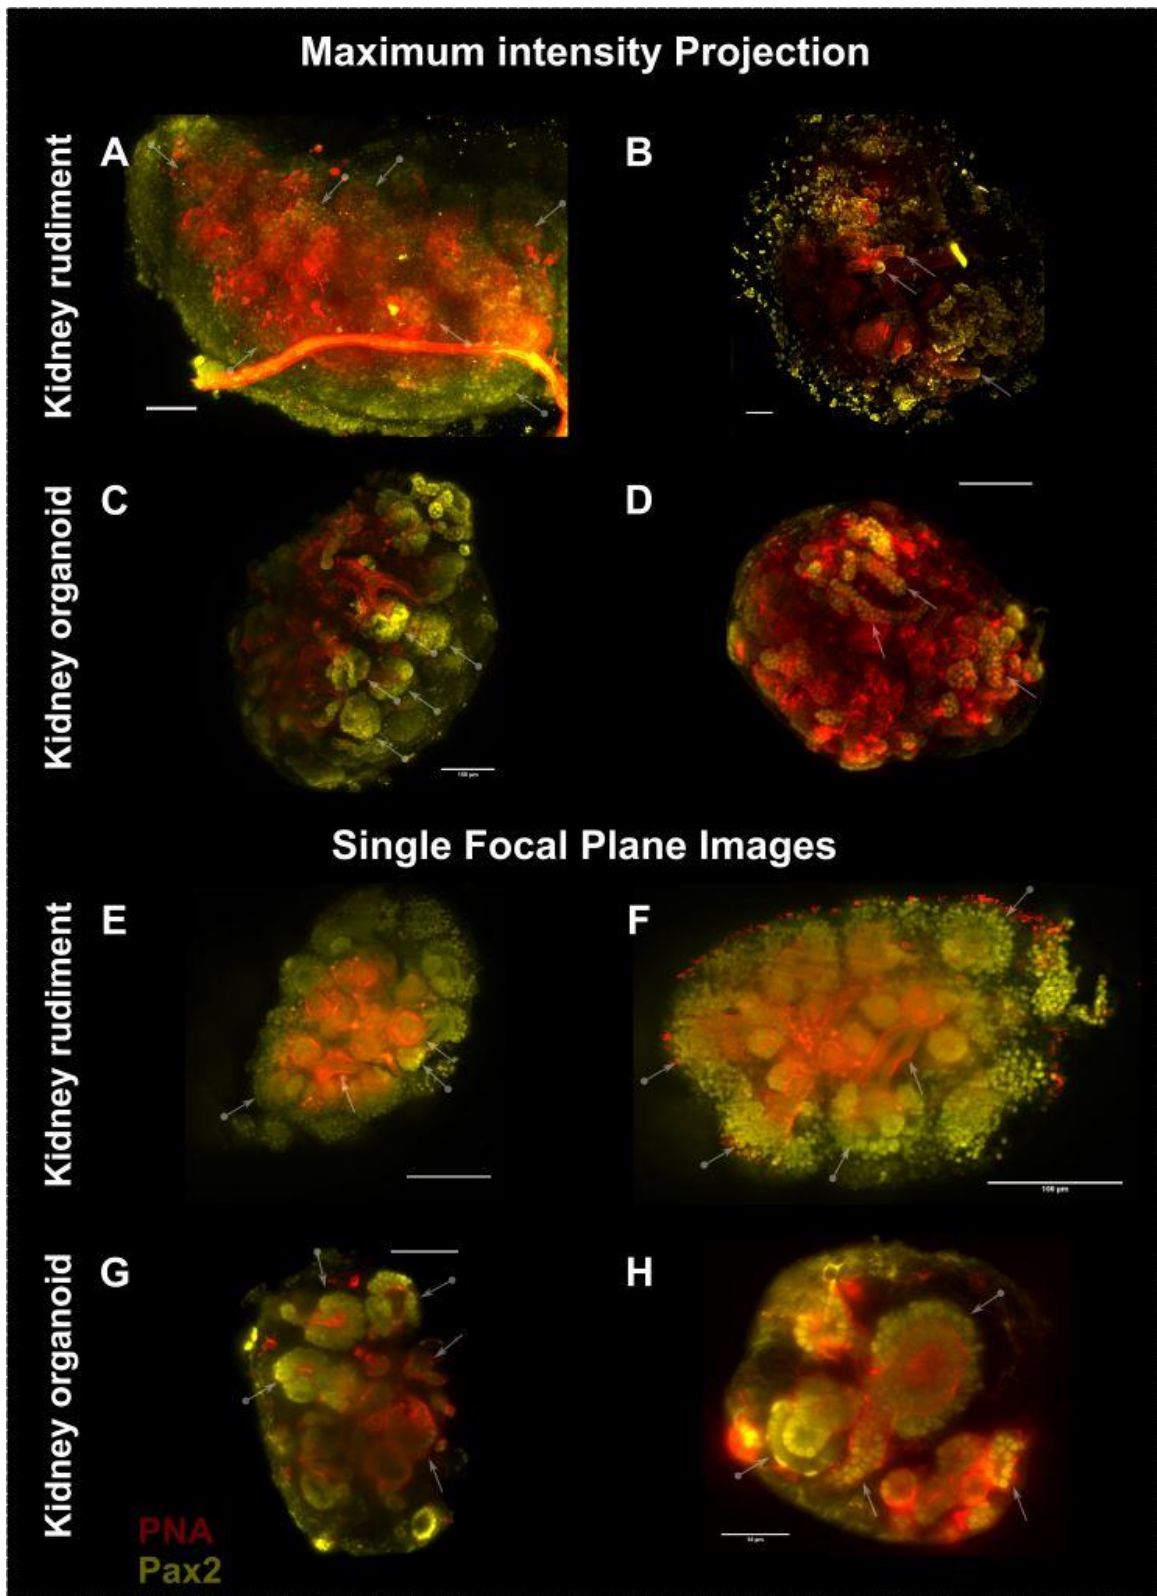

39

40

41

42

43

**SI Figure 4:** Immunostaining for the cap mesenchyme marker Pax2 and basement membrane staining (PNA). A-D show maximum intensity projections and E-H show single focal plane images of whole mount fixed and stained mouse embryonic E13.5 kidneys and organoids that were cultured for six days before fixing and staining. The Pax2<sup>+</sup> cells are grouped around structures highlighted with PNA, i.e. cap

44 mesenchyme (arrows with dot end). E-H show that the cap mesenchyme consists of 4-5 layers of cells,  
45 both in intact kidney rudiments and 6-day old organoids. Pax2+ cells are also present in structures  
46 surrounded by basement membrane, indicating ureteric bud (arrows). All samples were cleared. Scale  
47 bars 100  $\mu$ m.

48

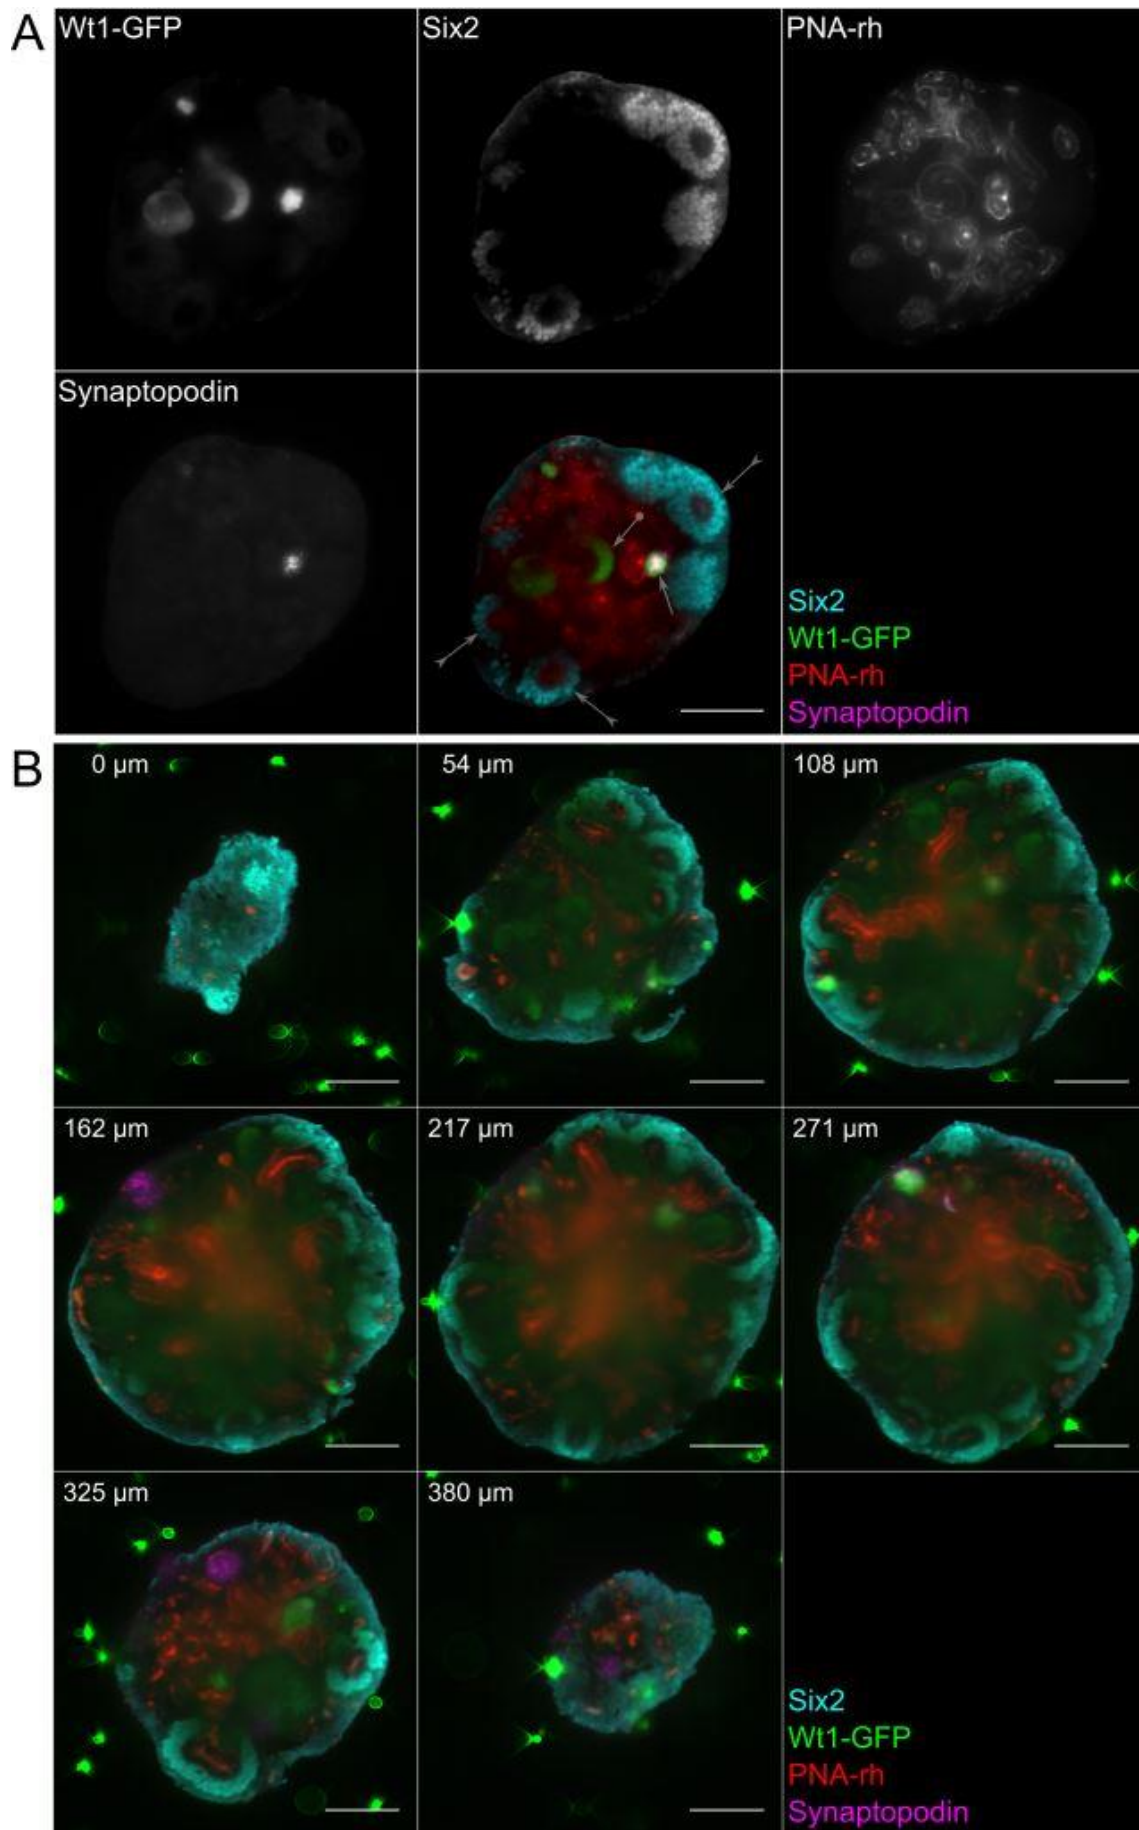

50 **SI Figure 5:** Immunostaining for the cap mesenchyme marker Six2. The images in (A) represent a single  
51 focal plane of a 6-day old renal organoid expressing Wt1-GFP and stained with PNA to label basement  
52 membranes, Six2 for cap mesenchyme and Synaptopodin for podocytes. The Six2<sup>+</sup> cells are aligned  
53 around ureteric bud highlighted with PNA (arrows with arrow head ends) and also slightly express Wt1-  
54 GFP. In the centre of the spheroid, there is an s-shaped body (arrow with dot end), which contains cells  
55 expressing Wt1-GFP. A glomerulus (arrow) is located right of the s-shaped body and strongly expresses  
56 Wt1 and is also Synaptopodin<sup>+</sup>. This staining pattern indicates that there are mature renal structures and  
57 nascent tubules within the spheroid at the same time. (B) shows the same organoid but at different depth  
58 indicated in the left top corner of each frame. The PNA and Wt1 signal are strong throughout the whole  
59 depth but the Six2 signal is limited to the first 75  $\mu\text{m}$  and unfortunately absent deep in the tissue. This  
60 organoid was not cleared. The organoid was recorded from five different angles and the data was  
61 successfully fused in Fiji. Scale bars: 100  $\mu\text{m}$ .

62



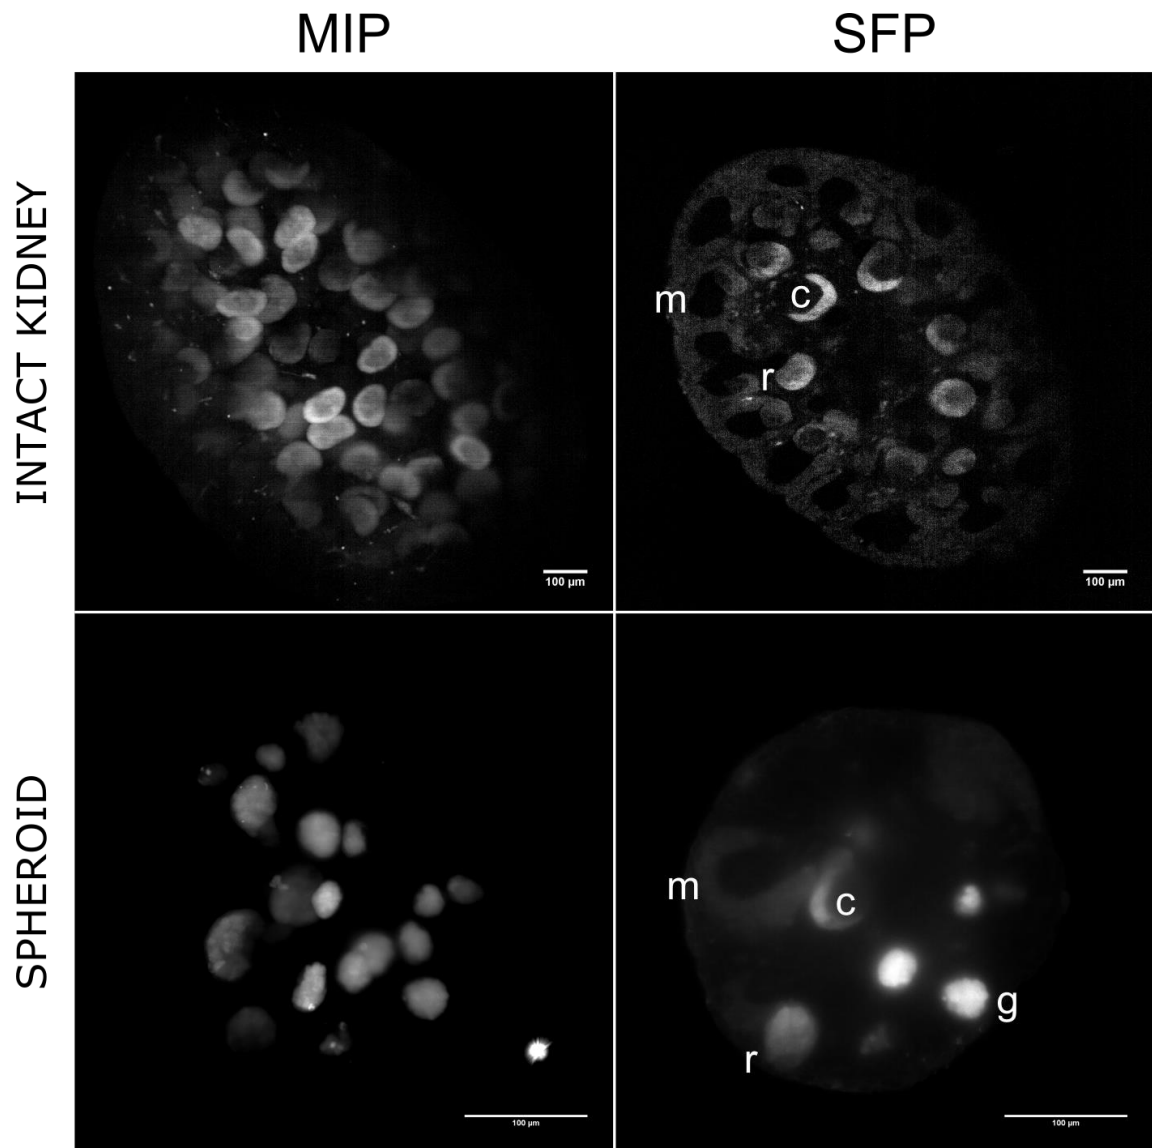

63

64

65

66

67

68

69

70

**SI Figure 6:** Wt1-GFP knock-in expression pattern in intact E13.5 kidneys and organoids cultured for 6 days. The same developmental structures - except glomerulus-like structures - can be identified in the *in vivo* and *in vitro* tissues: metanephric mesenchyme (m), cap mesenchyme (c), renal vesicle (r), glomerular structure (g). The Wt1-GFP signal was weak in the metanephric mesenchyme, increased in the cap-mesenchyme and further increased as the tubular and in particular the glomerular stages are reached. MIP: Maximum Intensity Projection, SFP: Single Focal Plane, Scale bar: 100 µm.

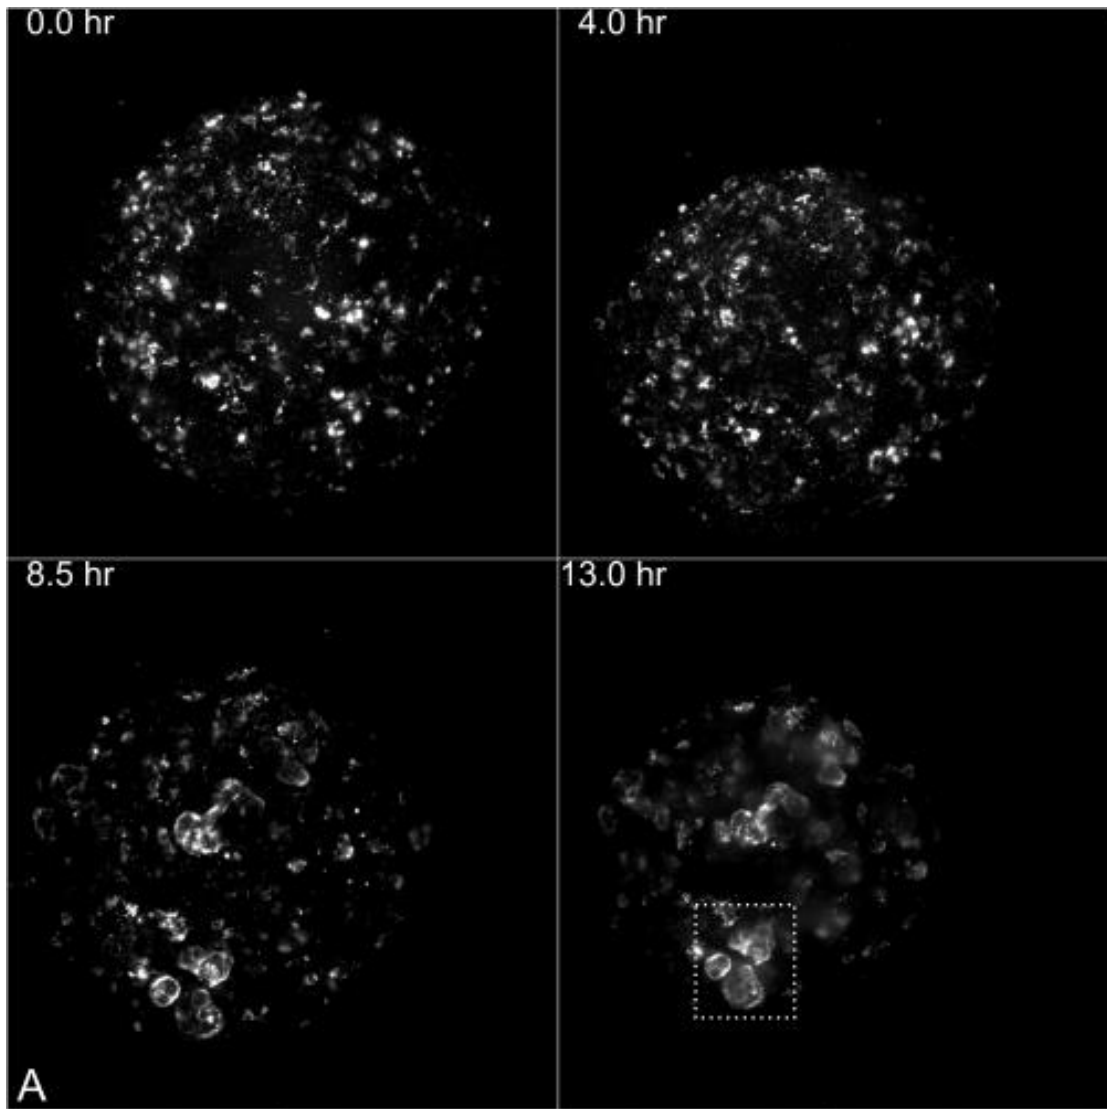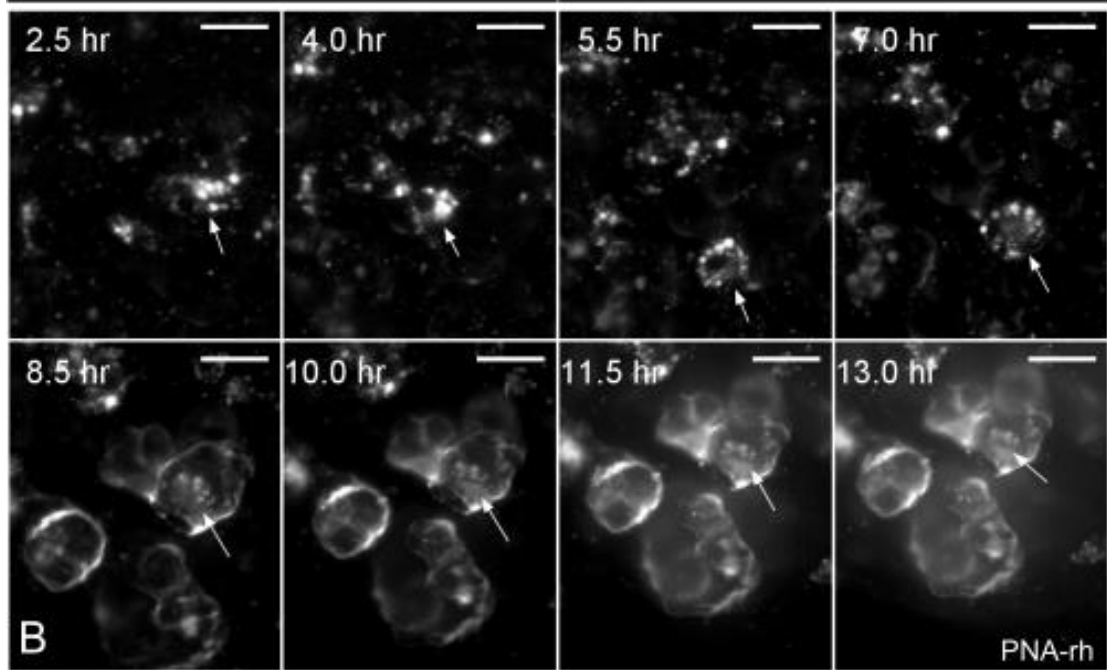

72 **SI Figure 7:** Live imaging of renal organoids using light sheet fluorescence microscopy. (A) maximum intensity  
73 projections of an organoid cultured for four days before embedding into a hydrogel cylinder, continued culture in  
74 the microscope and imaging ( $T = 0.0$  hr). Over time, the PNA dye penetrated the organoid and tubular structures  
75 became visible. The dashed rectangle in the 13 hr panel highlights the area showing as a detailed view of the  
76 same time series in B. The movement of a single cell (arrow) migrating towards and integrating into a tubule at  $T$   
77 = 8.5 hr can be followed throughout the course of the time series. Scale bar: 25 $\mu$ m.

78

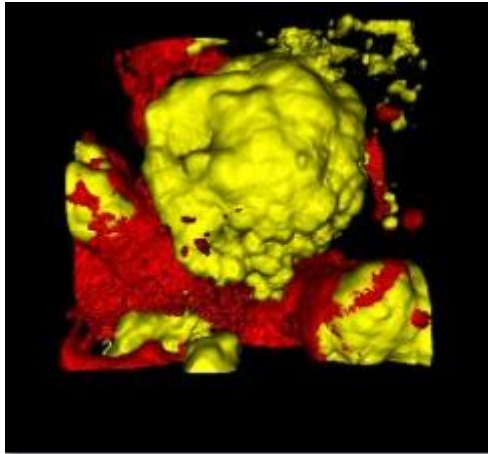

79

80

81

82

83

84

**SI Video 1:** Video showing a three-dimensional rendering of an isosurface fitting of basement membrane positive tubules (red) surrounded by several layers of Pax2 positive cells (yellow) demonstrating cells organised as cap mesenchyme around developing structures at day six of culture in a spheroid made from re-aggregated E13.5 mouse kidney cells.

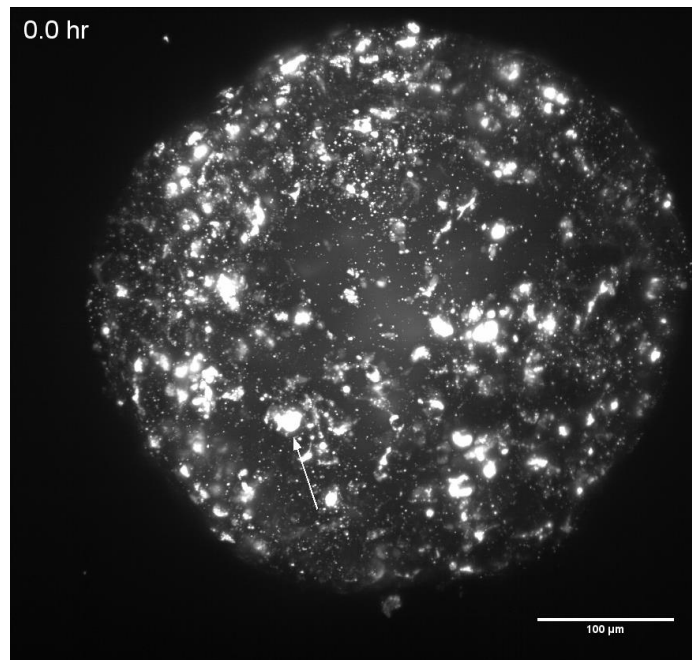

85

86

87

88

89

90

91

92

**SI Video 2:** Maximum intensity projection time series of a 4-day old spheroid labelled with PNA. The dye was added to the system upon the start of imaging. The imaging interval was 30 minutes. Initially, the spheroid is indiscriminately labelled but from the 4.0 hr imaging frame onwards, structures become cognisable. An arrow indicates a single labelled cell throughout the time series that integrates into a tubule at 8.5 hr.

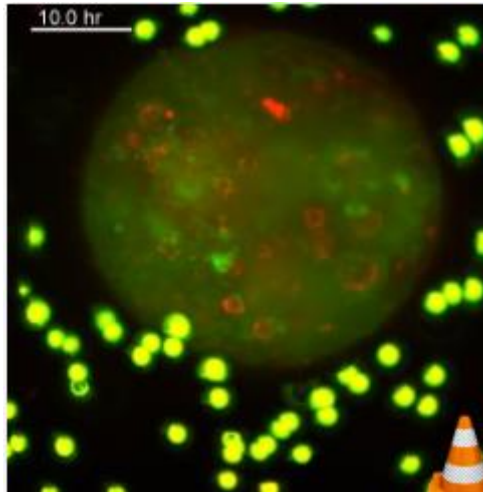

93

94

95

96

97

98

**SI Video 3:** Time series of the maximum intensity projection of a live time series. Cells in green are expressing WT1-GFP, the red signal are basement membranes stained with PNA. The bright green structures are green beads that were dispersed throughout the agarose gel, providing fiduciary markers for multiview reconstruction of the time series.

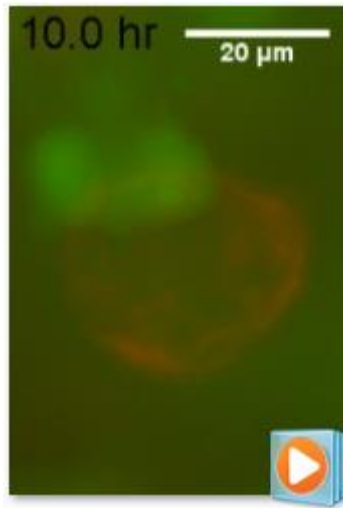

99

100

101

102

103

**SI Video 4:** Detail of the time series shown in SI Video 3. Maximum intensity projection of a live time series. Cells in green are expressing WT1-GFP, the red signal are basement membranes stained with PNA. Several cells can be seen migrating within and around tubules labelled with PNA.

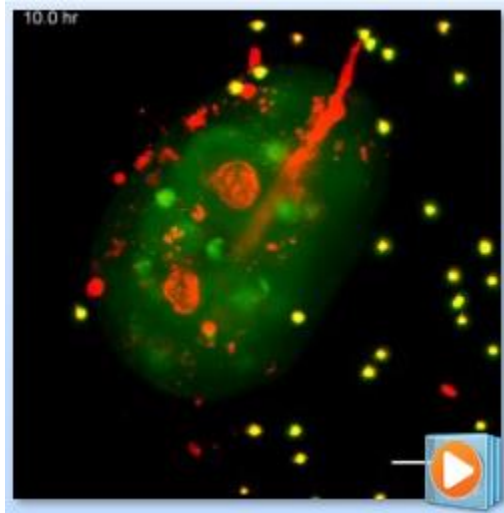

104

105

106

107

108

109

**SI Video 5:** Time series of the maximum intensity projection of a live time series. Cells in green are expressing WT1-GFP, the red signal are basement membranes stained with PNA. The bright green structures are green beads that were dispersed throughout the agarose gel, providing fiduciary markers for multiview reconstruction of the time series.



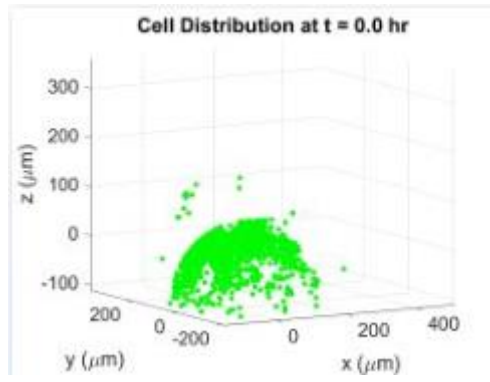

110

111

**SI Video 6:** Spot distribution of "Experiment 1" as determined by the automated tracking tool TrackMate.
